# Supplementary material
Source: PubMed Central journal article supplement (PMC4665794)
Supplement: JCI82045.sd.pdf [file JCI82045.sd.pdf]

## **Supplemental Data**

**Bernier-Latmani et al., “DLL4 promotes continuous lacteal regeneration in the adult small intestine”.**

**6 Supplemental Figures**

**4 Supplemental Movies**

**3 Supplemental Tables**

Supplemental Figure 1

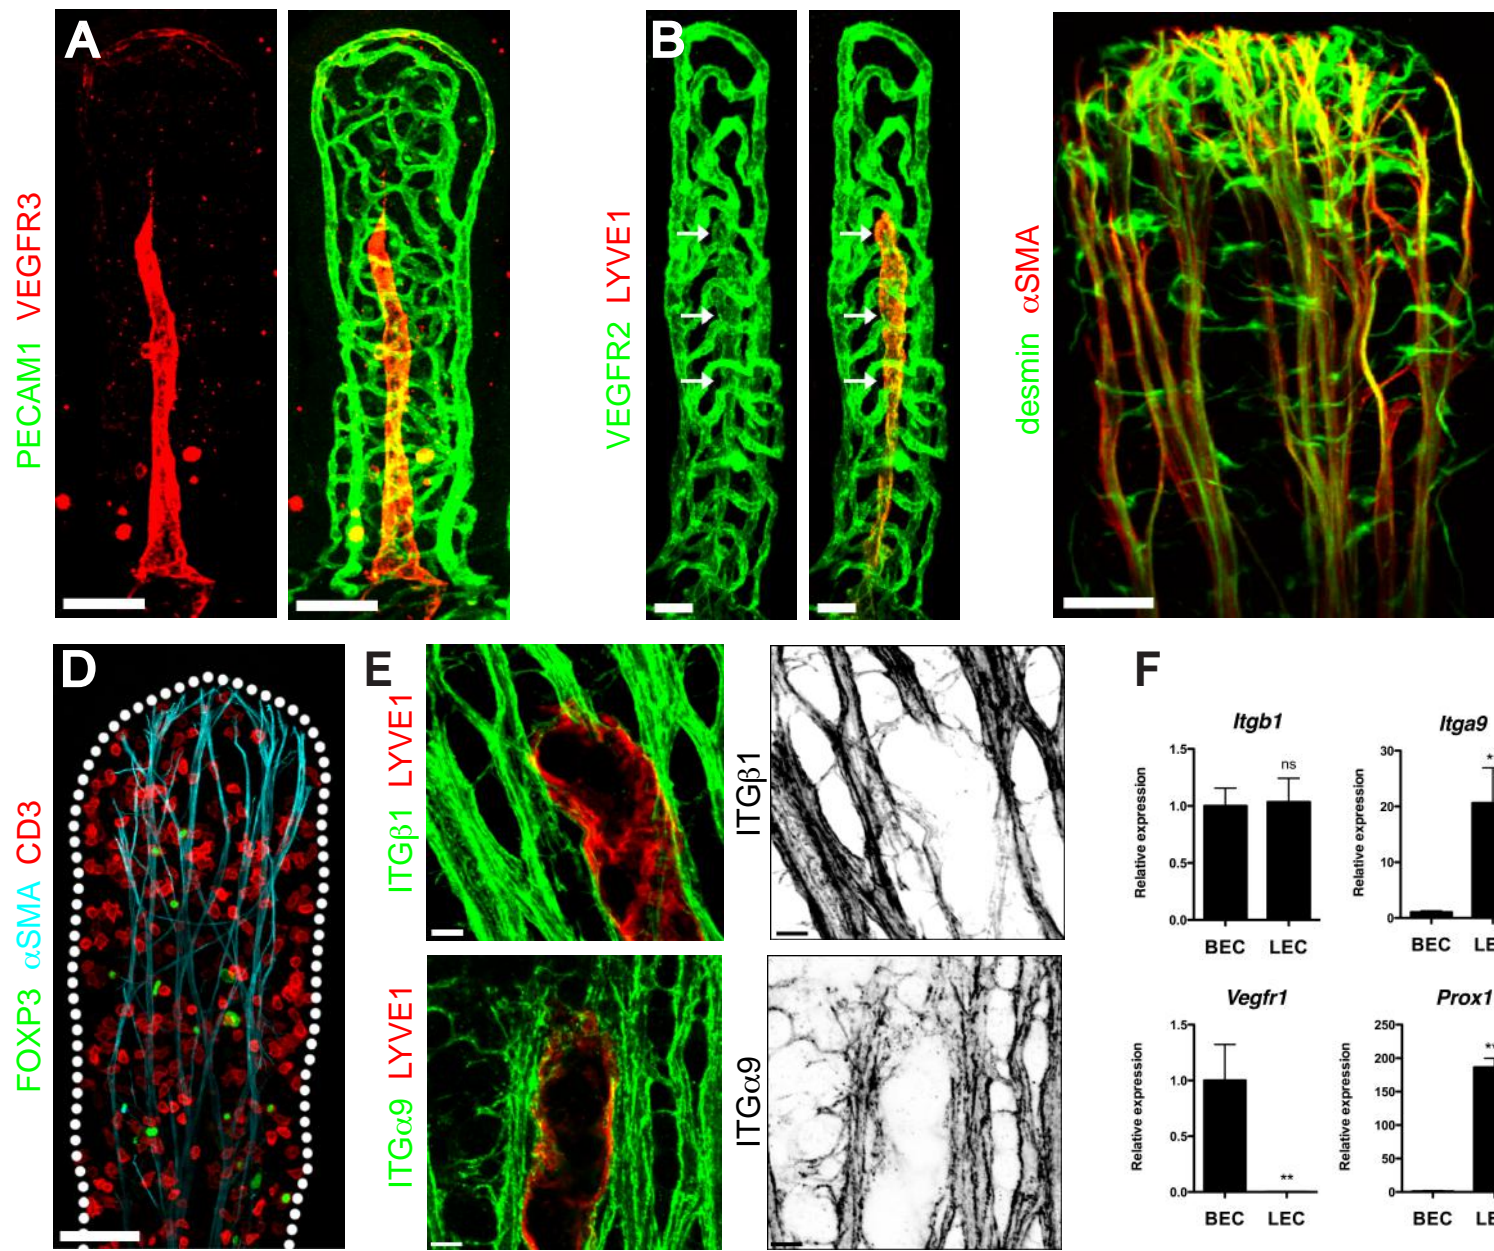

**Supplemental Figure 1: Characterization of small intestinal stroma.** (A) VEGFR3 (red) is expressed at high levels in adult lacteals and on blood capillaries (PECAM1, green) at the villus tip (yellow). (B) VEGFR2 (green) is expressed at high levels on villus blood capillaries and at lower, but detectable, levels on lacteals (arrows). (C) Desmin (green) is co-expressed with  $\alpha$ SMA (red) on villus SMCs and expressed by a population of  $\alpha$ SMA<sup>neg</sup> pericyte-like cells. (D) FOXP3<sup>+</sup> regulatory T cells (FOXP3, green nuclei; CD3, red membrane) are closely associated with villus SMCs ( $\alpha$ SMA, cyan). (E) Whole-mount immunostaining for ITG $\beta$ 1 and ITG $\alpha$ 9 (green, black) and lacteals (LYVE1, red) in adult intestinal villi. (F) RT-qPCR analysis of *Itgb1* and *Itga9* expression in sorted intestinal LECs and BECs. Mean  $\pm$  s.d. of relative expression,  $n=3$ . Isolation purity was confirmed by analyzing expression of BEC marker *Vegfr1* and LEC marker *Prox1*. Scale bars: 50  $\mu$ m A, D; 25  $\mu$ m B; 20  $\mu$ m C; 5  $\mu$ m F. \*\*  $P < 0.01$ , \*\*\* $P < 0.001$ , two-tailed unpaired Student's  $t$ -test.

Supplemental Figure 2

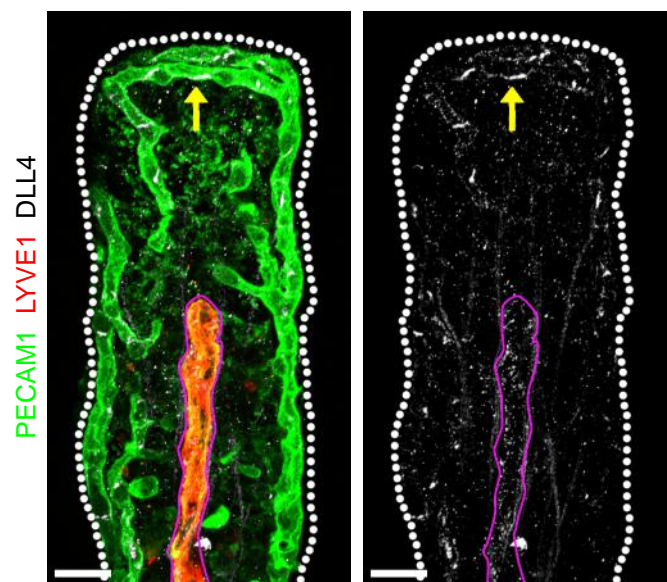

**Supplemental Figure 2:** DLL4 (white) displays perinuclear localization in both villus arterioles (PECAM1, green, arrow) and lacteals (pink outline). Scale bar: 20  $\mu$ m.

Supplemental Figure 3

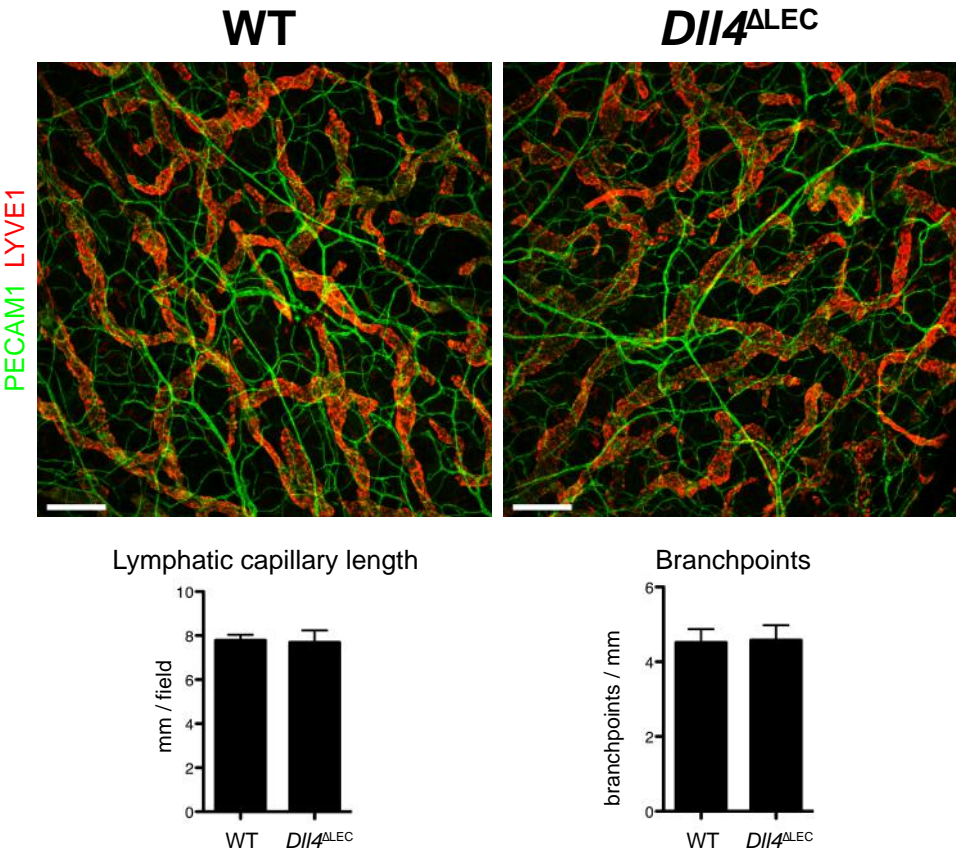

**Supplemental Figure 3:** Dermal lymphatic capillary (LYVE1, red) length and branching are unchanged in *Dll4*<sup>ΔLEC</sup> mice (PECAM1, green) 5 weeks after tamoxifen injection. Mean  $\pm$  s.d. of lymphatic capillary length and number of branchpoints in control and *Dll4*<sup>ΔLEC</sup> mice,  $n=5$ . Scale bar: 200  $\mu\text{m}$ .

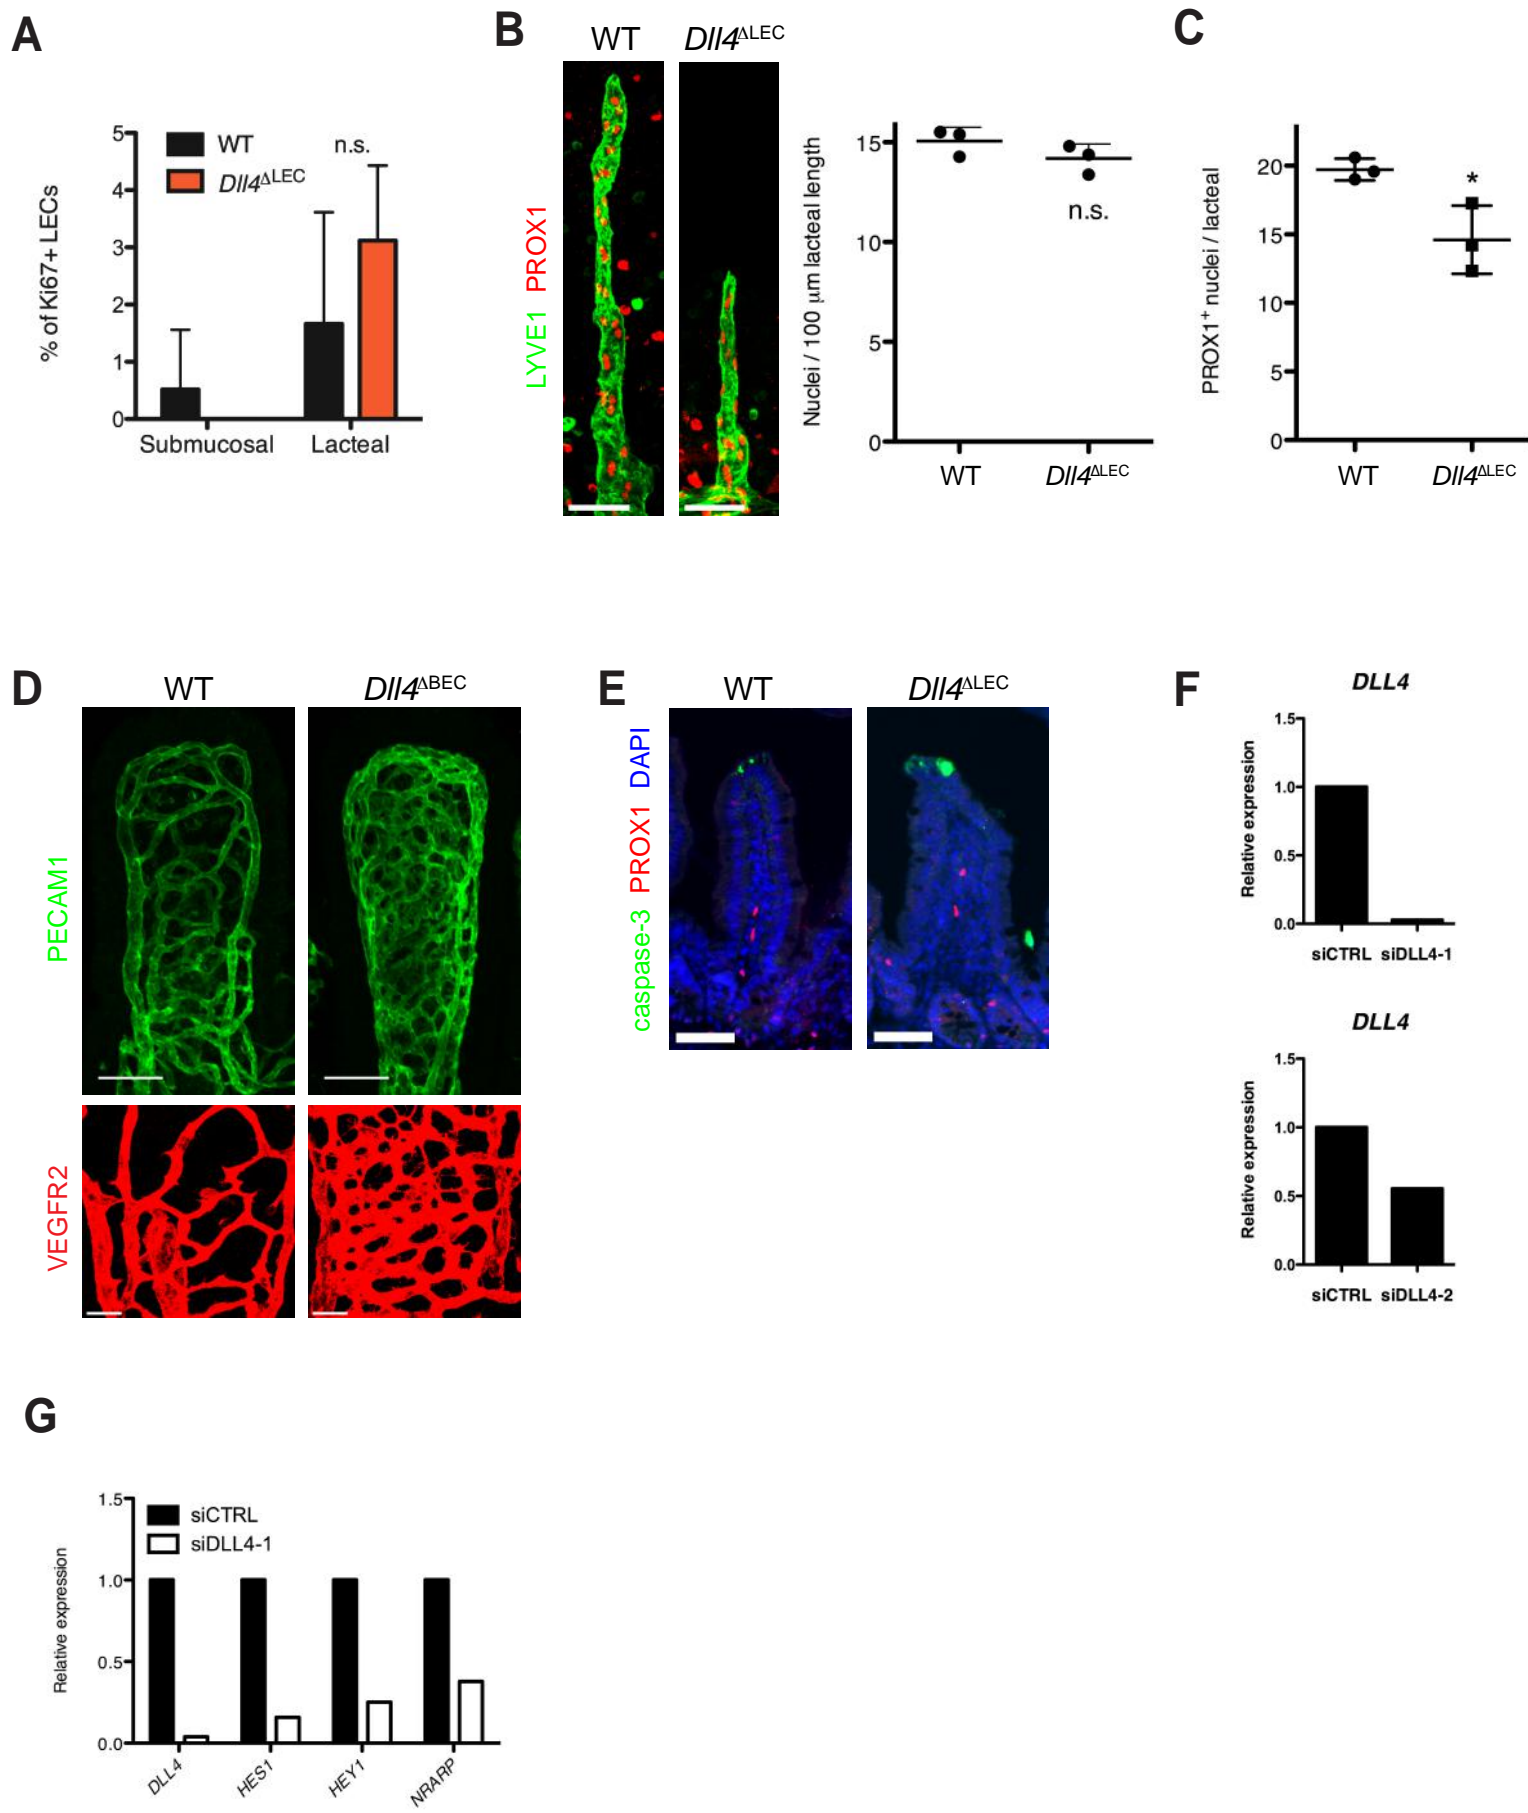

**Supplemental Figure 4: Further characterization of DLL4 signaling in lymphatic and blood vessels.** (A) Proliferation rate of intestinal LECs is comparable between *Dll4*<sup>ΔLEC</sup> and control mice. Mean ± s.d. % Ki67<sup>+</sup> LECs in control and *Dll4*<sup>ΔLEC</sup> submucosal and lacteal lymphatic vessels, *n*=4-6. (B) The number of LECs (PROX1, red) per lacteal length (LYVE1, green) is similar between *Dll4*<sup>ΔLEC</sup> and control mice. Mean ± s.d. of PROX1<sup>+</sup> nuclei/ 100 μm lacteal length, *n*=3. (C) Quantification of total LEC number in *Dll4*<sup>ΔLEC</sup> and control lacteals. Mean ± s.d. of PROX1<sup>+</sup> nuclei/ lacteal, *n*=3. (D) Intestinal blood vessel *Dll4* deletion increases the number of filopodia and vessel branches. Representative whole-mount images of villus blood capillaries (top, PECAM1, green; bottom, VEGFR2, red) in control and *Dll4*<sup>ΔBEC</sup> mice. (E) Immunostaining for PROX1 (red) and caspase-3 (green) in intestinal villi from control and *Dll4*<sup>ΔLEC</sup> mice. Virtually no PROX1<sup>+</sup>/ caspase-3<sup>+</sup> cells were detected in mice of either genotype. (F) siRNA-mediated knockdown of *DLL4* in LECs 24 hours after transfection, analyzed by RT-qPCR. Mean of relative expression. Data shown are representative of two independent experiments. (G) LEC expression of Notch target genes *HES1*, *HEY1* and *NRARP* following transfection with either control or *DLL4*-specific siRNA, analyzed by RT-qPCR. Data shown are representative of two independent experiments. Scale bars: 50 μm B, D (top), E; 20 μm D (bottom). \**P* < 0.05, two-tailed unpaired Student's *t*-test.

Supplemental Figure 5

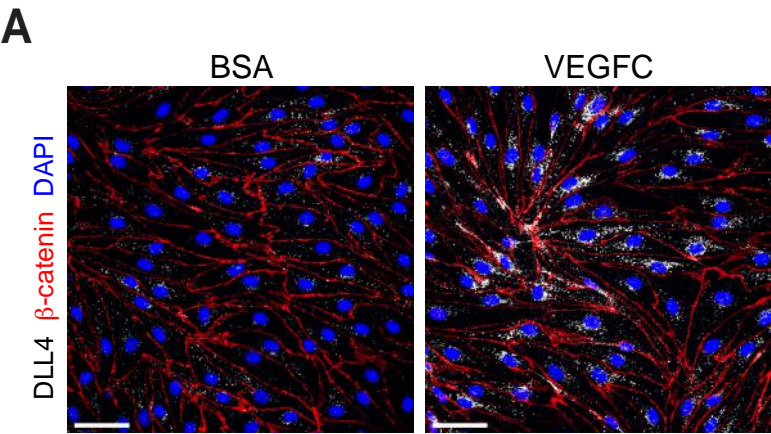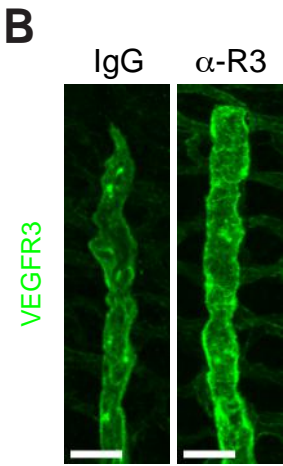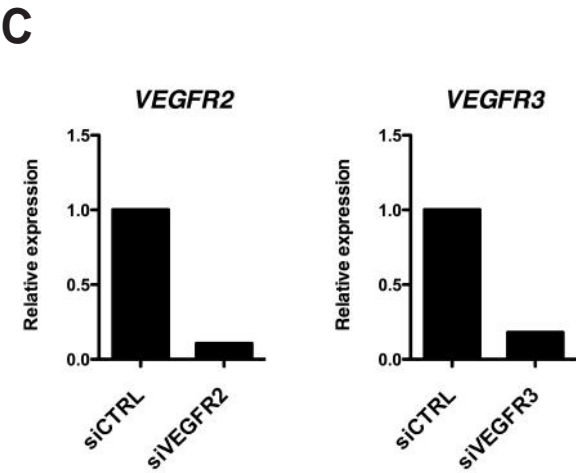

**Supplemental Figure 5: Regulation of DLL4 by VEGFR2 and VEGFR3 signaling.** (A) VEGFC induces DLL4 in cultured LECs. Representative images of DLL4 (white) expression in cultured LECs ( $\beta$ -catenin, red; DAPI, blue) after 48 hours of BSA or VEGFC treatment. Data shown are representative of two independent experiments. (B) Increased membrane VEGFR3 (green) localization in lacteals after 7 days treatment with  $\alpha$  VEGFR3. (C) Efficient siRNA-mediated knockdown of *VEGFR2* and *VEGFR3* in LECs 24 hours after transfection, analyzed by RT-qPCR. Mean of relative expression. Data shown are representative of two independent experiments. Scale bars: 50  $\mu$ m A; 20  $\mu$ m, B.

Supplemental Figure 6

**A**

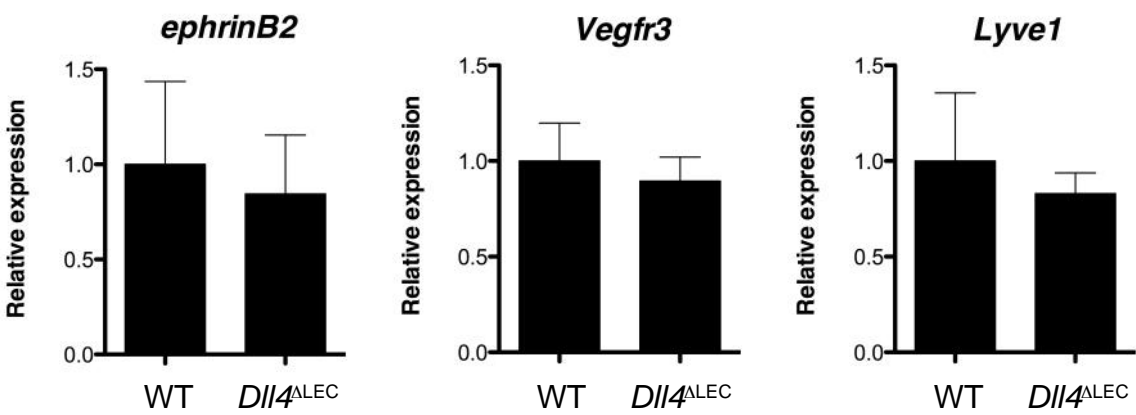

**B**

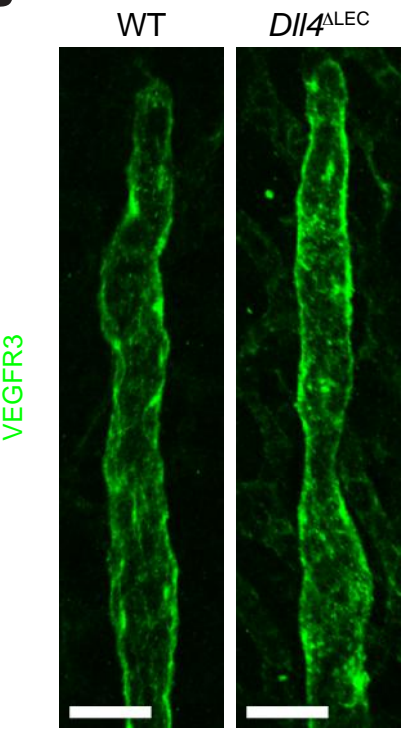

**Supplemental Figure 6:** (A) Expression of intestinal LEC *ephrinB2*, *Vegfr-3* and *Lyve-1* are unchanged in *Dll4*<sup>ΔLEC</sup> mice. Mean ± s.d. of relative expression as analyzed by qPCR. (B) Lacteal VEGFR3 is not decreased in *Dll4*<sup>ΔLEC</sup> mice. Representative images of VEGFR3 (green) on lacteals from control and *Dll4*<sup>ΔLEC</sup> mice. Scale bar: 20 μm.

**Supplemental Movies 1-4:** Individual LEC migration was tracked for 20 hours after a wound was made in a LEC monolayer transfected with either control or DLL4-specific siRNA and treated with BSA or VEGFC. Images were recorded every 15 min. Cell migration tracks are overlaid on movies for path visualization. Track colors are arbitrary.

**Supplemental Movie 1:** siCTRL+BSA

**Supplemental Movie 2:** siDLL4+BSA

**Supplemental Movie 3:** siCTRL+VEGFC

**Supplemental Movie 4:** siDLL4+VEGFC

## SUPPLEMENTAL TABLES

**Supplemental Table 1: Antibodies used in the study**

|                      | <b>Antibody</b>           | <b>Supplier</b> | <b>Catalog number/clone</b> |
|----------------------|---------------------------|-----------------|-----------------------------|
| <b>Wholemound</b>    | $\alpha$ -SMA-Cy3 (mouse) | Sigma           | C6198                       |
|                      | $\beta$ -catenin (rabbit) | Millipore       | 06-734                      |
|                      | CD3 (hamster)             | Biolegend       | 100301                      |
|                      | CD11c (hamster)           | BD Pharmingen   | 117313                      |
|                      | Desmin (rabbit)           | Millipore       | 04-585                      |
|                      | Dll4 (goat)               | R&D             | AF1389                      |
|                      | E-cadherin (rabbit)       | Cell Signaling  | 3195S                       |
|                      | F4/80 (rat)               | Invitrogen      | MF48000                     |
|                      | Fibronectin (rabbit)      | Millipore       | AB2033                      |
|                      | Foxp3 (rat)               | eBioscience     | 14-5773                     |
|                      | GFP (rat)                 | Biolegend       | 338002                      |
|                      | Lyve-1 (rabbit)           | AngioBio        | 11-034                      |
|                      | Lyve-1 (rat)              | R&D             | MAB2125                     |
|                      | NG2 (rabbit)              | Millipore       | AB5320                      |
|                      | Pecam-1 (rat)             | BD Pharmingen   | 557355                      |
|                      | Periostin (goat)          | R&D             | AF2955                      |
|                      | Prox1 (goat)              | R&D             | AF2727                      |
|                      | Tenascin C (rat)          | R&D             | MAB 2138                    |
|                      | VE-cadherin (goat)        | R&D             | AF1002                      |
|                      | Vegfr-2 (goat)            | R&D             | AF644                       |
|                      | Vegfr-3 (goat)            | R&D             | MAB3491                     |
|                      | Vegfr-3 (rat)             | Eli Lilly       | clone mF4-31C1              |
| <b>Paraffin</b>      | Ki67 (mouse)              | BD Pharmingen   | 556003                      |
|                      | Prox1 (goat)              | R&D             | AF2727                      |
| <b>Cell sorting</b>  | CD31-PE                   | eBioscience     | 12-0311-81                  |
|                      | CD45-Apc-Cy7              | eBioscience     | 25-0451-81                  |
|                      | EpCAM-eFluor 450          | Biolegend       | 48-5791-80                  |
|                      | gp38-AlexaFluor 647       | hybridoma       | clone 8.1.1                 |
| <b>Secondary Abs</b> | Alexa Fluor 488           | Invitrogen      |                             |
|                      | Alexa Fluor 555           | Invitrogen      |                             |
|                      | Alexa Fluor 647           | Invitrogen      |                             |

**Supplemental Table 2. Primers used for RT-qPCR analysis**

| <b>Gene</b>     | <b>Species</b>  | <b>Forward primer</b>             | <b>Reverse primer</b>          |
|-----------------|-----------------|-----------------------------------|--------------------------------|
| <i>18S</i>      | Human/<br>mouse | 5'-AGGAATTCCCAGTAAGTGCG           | 5'-GCCTCACTAAACCATCCAA         |
| <i>Dll4</i>     | mouse           | 5'-GGAACCTTCTCACTCAACATCC         | 5'-CTCGTCTGTTTCGCCAAATCT       |
| <i>ephrinB2</i> | mouse           | 5'-ATTATTTGCCCCAAAGTGGA           | 5'-GCAGCGGGGTATTCTCCTTC        |
| <i>Itga9</i>    | mouse           | 5'-TGCTTTCCAGTGTTGACGAGA          | 5'-TTAAAGGACACGTTGGCATCATA     |
| <i>Itgb1</i>    | mouse           | 5'-AATGCCAAATCTTGCGGAGAA          | 5'-TCTAAATCATCACATCGTGCAGAAGTA |
| <i>Lyve-1</i>   | mouse           | 5'-TGGTGTACTCCTCGCCTCT            | 5'-TTCTGCGCTGACTCTACCTG        |
| <i>Prox1</i>    | mouse           | 5'-AAGATATGTCCGACATCTCACCTTATTCAG | 5'-CACGTCCGAGAAGTAGGTCTTCAG    |
| <i>Vegfr-1</i>  | mouse           | 5'-TGGCTCTACGACCTTAGACTG          | 5'-CAGGTTTGACTTGTCTGAGGTT      |
| <i>Vegfr-3</i>  | mouse           | 5'-CTGGCCAGAGGCACTAAGAC           | 5'-CAGGGTGTCTCTGGGAATA         |
| <i>DLL4</i>     | human           | 5'-TGGGTCAGAACTGGTTATTGGA         | 5'-GTCATTGCGCTTCTTGACAG        |
| <i>HES1</i>     | human           | 5'-AAGAAAGATAGCTCGCGGCAT          | 5'-CCAGCACACTTGGGTCTGT         |
| <i>HEY1</i>     | human           | 5'-AAGAAAGATAGCTCGCGGCAT          | 5'-CGTCAAAGTAACCTTCCCTCCT      |
| <i>NRARP</i>    | human           | 5'-TCAACGTGAACTCGTTTCGGG          | 5'-ACTTCGCCTTGGTGATGAGAT       |
| <i>VEGFR-2</i>  | human           | 5'-GGAACCTCACTATCCGCAGAGT         | 5'-CCAAGTTCGTCTTTCTCTGGGC      |
| <i>VEGFR-3</i>  | human           | 5'-GCACTGCCACAAGAAGTACCT          | 5'-GCTGCACAGATAGCGTCCC         |

**Supplemental Table 3. siRNA used for in vitro mRNA silencing**

| <b>Target Gene</b>    | <b>Supplier</b>   | <b>Reference number</b> |
|-----------------------|-------------------|-------------------------|
| siAllstar (siControl) | Qiagen            | 1027281                 |
| siDLL4                | Life Technologies | 132858                  |
| siDLL4                | Life Technologies | 132859                  |
| siDLL4 (pool)         | Dharmacon         | L-010490-00-0005        |
| siVEGFR-2             | Thermo Scientific | L-003148-00             |
| siVEGFR-3             | Thermo Scientific | L-003138-00             |
